# Supplementary material for: Preexisting antibodies can protect against congenital cytomegalovirus infection in monkeys
Source: JCI journal article supplement (doi:10.1172/jci.insight.94002), 2017-07-05
Supplement: sd1 [file 1]

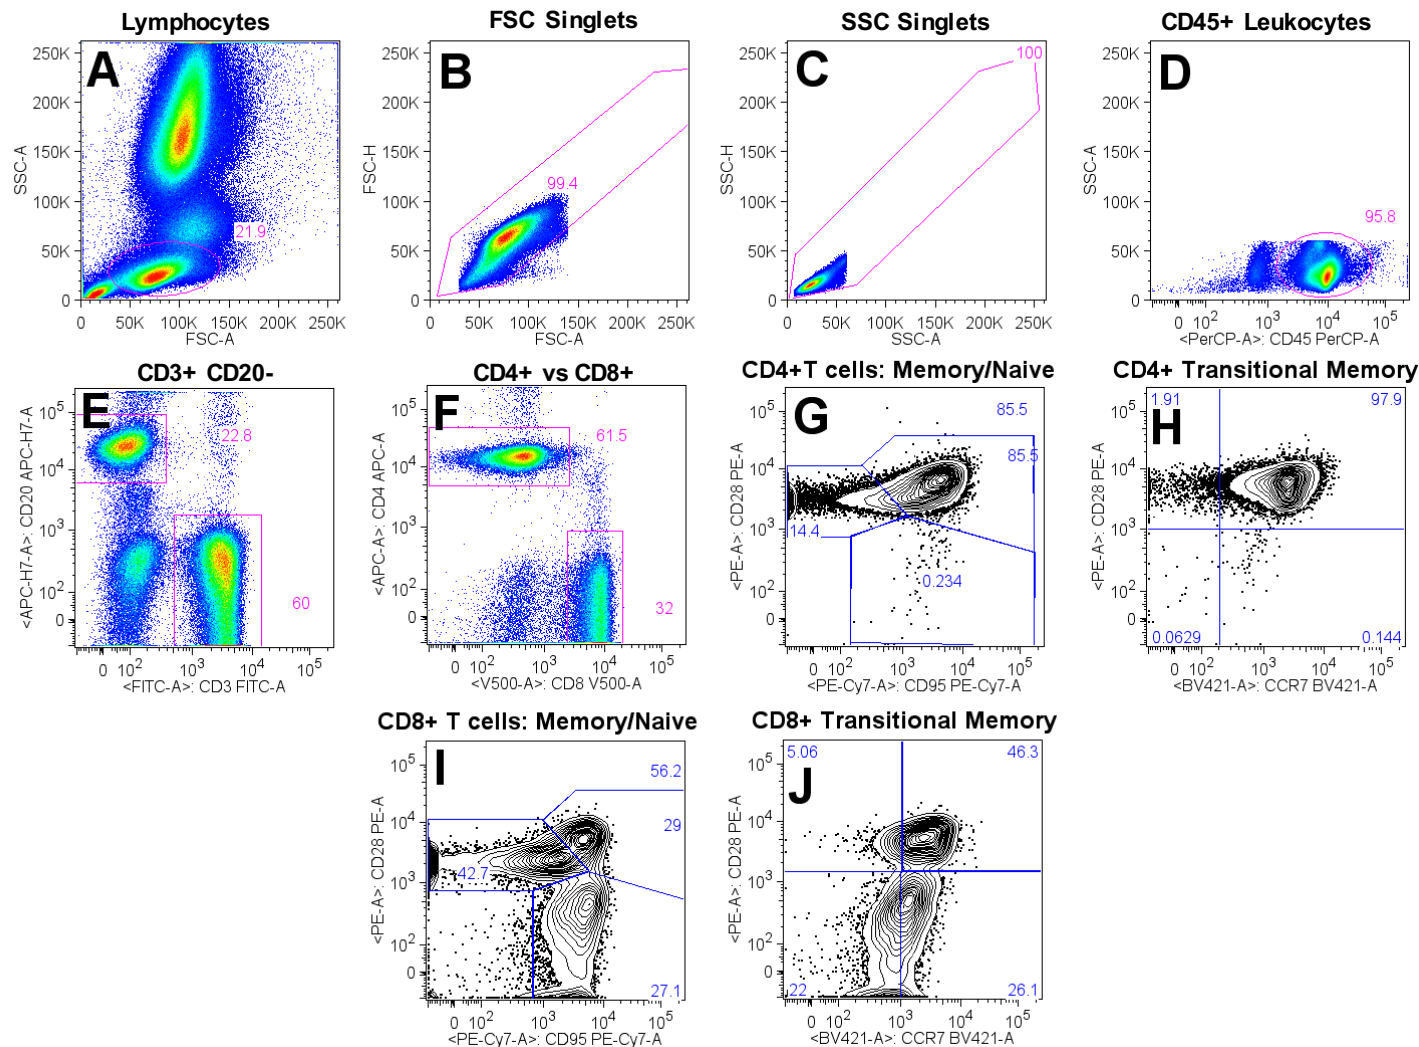

**Supplemental Figure 1. Flow cytometry gating of peripheral blood mononuclear cells for T cell phenotyping.** A generous lymphocyte gate was applied (**A**), then FSC singlets (**B**), SSC singlets (**C**), and CD45+ leukocytes (**D**) were selected. Next, the CD3+ T cell population was identified (**E**), and CD4+ and CD8+ T cell populations defined (**F**). Central memory , effector memory, and naive CD4+ and CD8+ T cell subsets were classified as either CD28+CD95+, CD28- CD95+, and CD28+CD95-, respectively (**G,I**). Transitional memory T cells were characterized as CD28+CCR7- (**H,J**).

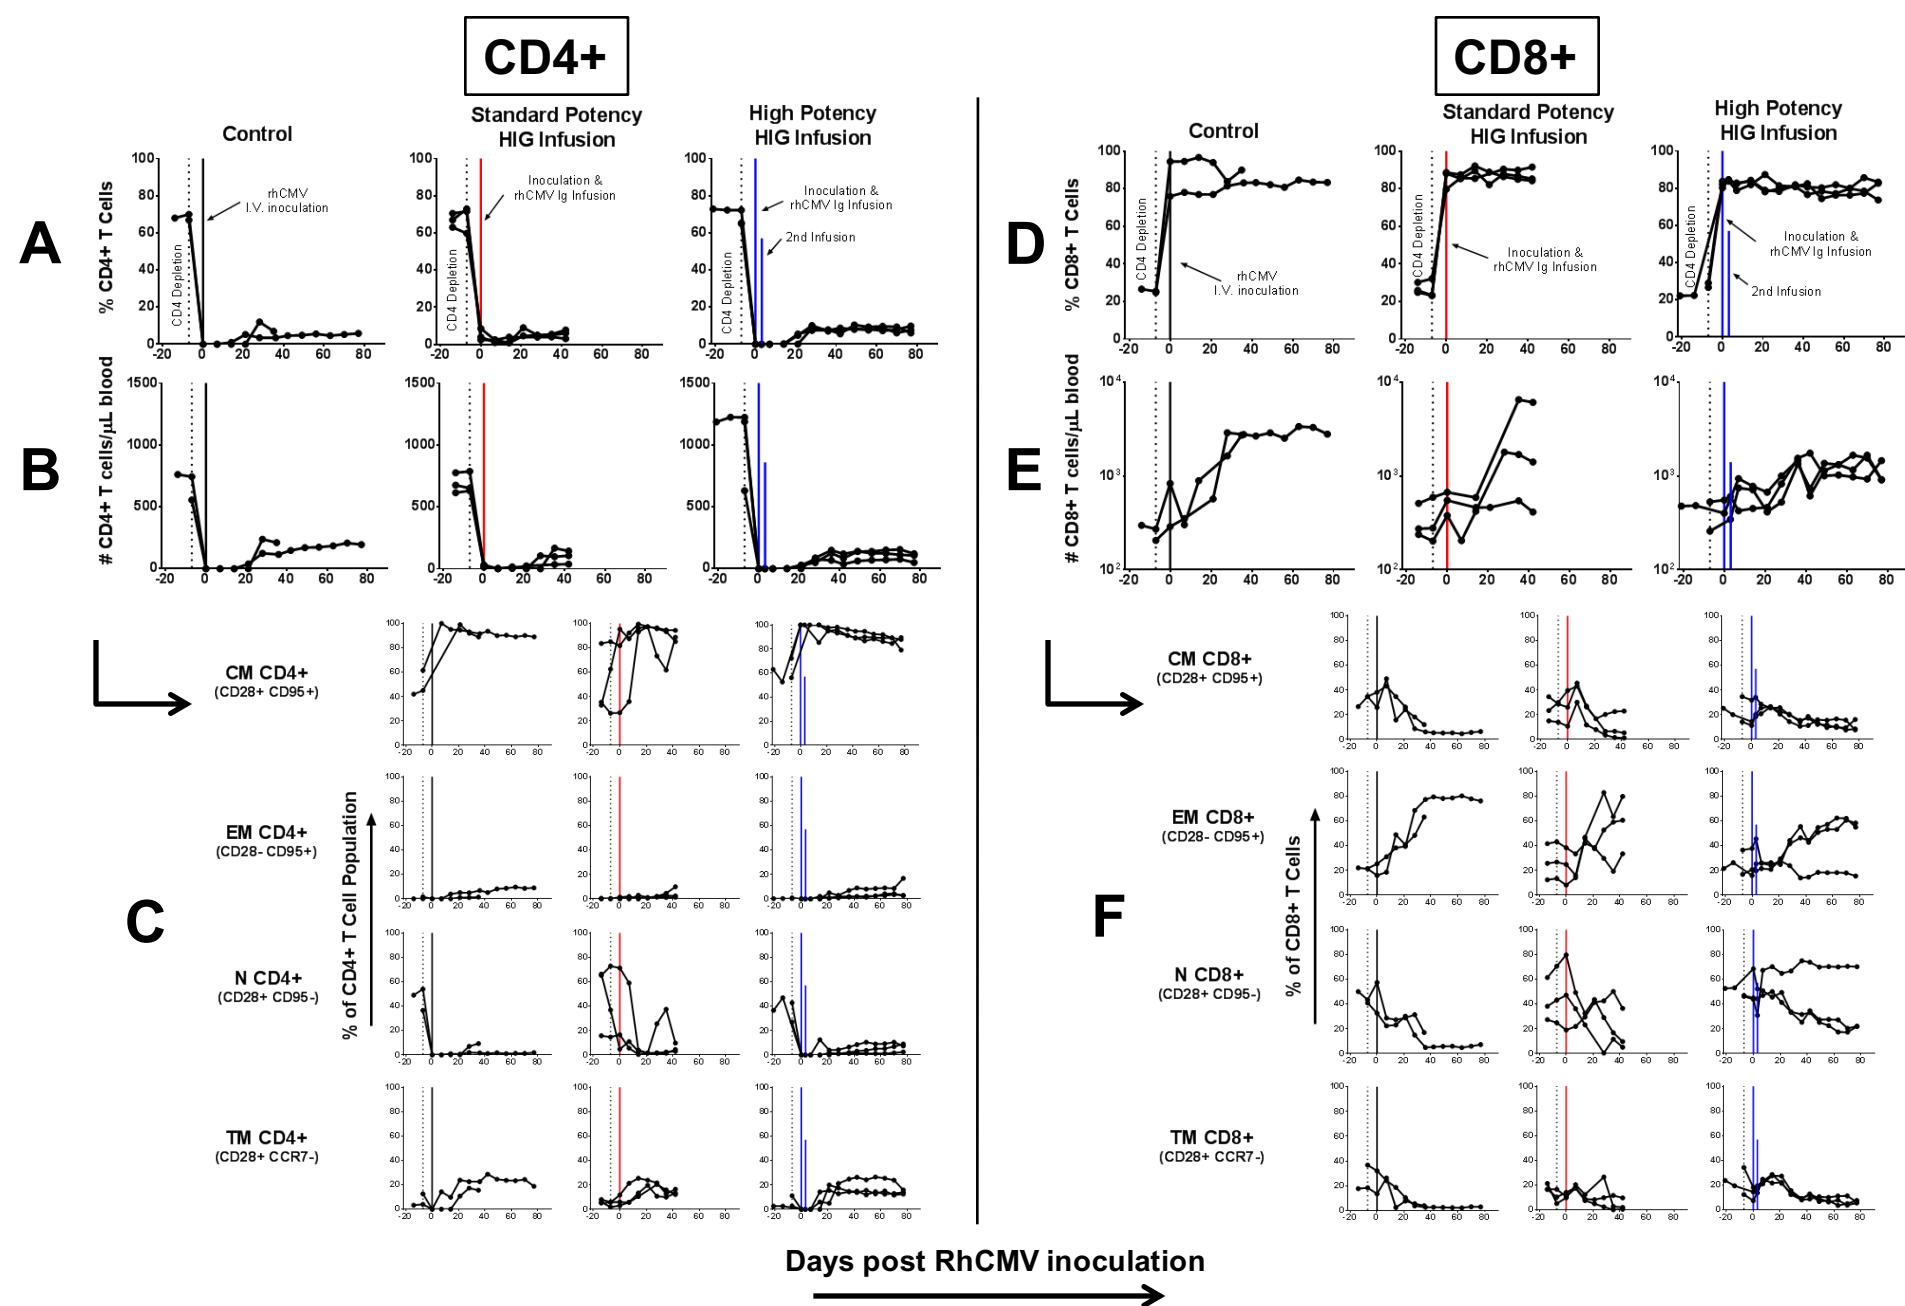

Supplemental Figure 2. Peripheral CD4+ and CD8+ T cell kinetics and subset proportions are similar between treatment groups

following CD4+ T cell depletion by anti-CD4+ mAb infusion. Legend next page.

**Supplemental Figure 2. Peripheral CD4+ and CD8+ T cell kinetics and subset proportions are similar between treatment groups following CD4+ T cell depletion by anti-CD4+ mAb infusion.** Both the percentage of peripheral CD4+ T cells (**A**) and the absolute number of peripheral CD4+ T cells (**B**) declined dramatically in all animals following administration of CD4+ T cell depleting antibody (CD4R1 clone), as indicated by vertical dotted black line, and remained suppressed without full recovery throughout the study. The percentages of central memory (CM) CD4+ T cells (CD28+CD95+), effector memory (EM) CD4+ T cells (CD28-CD95+), naïve (N) CD4+ T cells (CD28+CD95-), and transitional memory (TM) CD4+ T cells (CD28+CCR7-) are similar between treatment groups (**C**), with CM cells representing the dominant phenotype in the recovering population. Following CD4+ T cell depletion and RhCMV infection, both the relative percentage of peripheral CD8+ T cells (**D**) and the absolute number of peripheral CD8+ T cells (**E**) increased in all animals. Furthermore, analysis of CD8+ T cell subsets including central memory (CM) CD8+ T cells (CD28+CD95+), effector memory (EM) CD8+ T cells (CD28-CD95+), naïve (N) CD8+ T cells (CD28+CD95-), and transitional memory (TM) CD8+ T cells (CD28+CCR7-) (**F**) demonstrated that the EM population generally increased over time and CM/N/TM populations declined in a pattern consistent with primary infection.

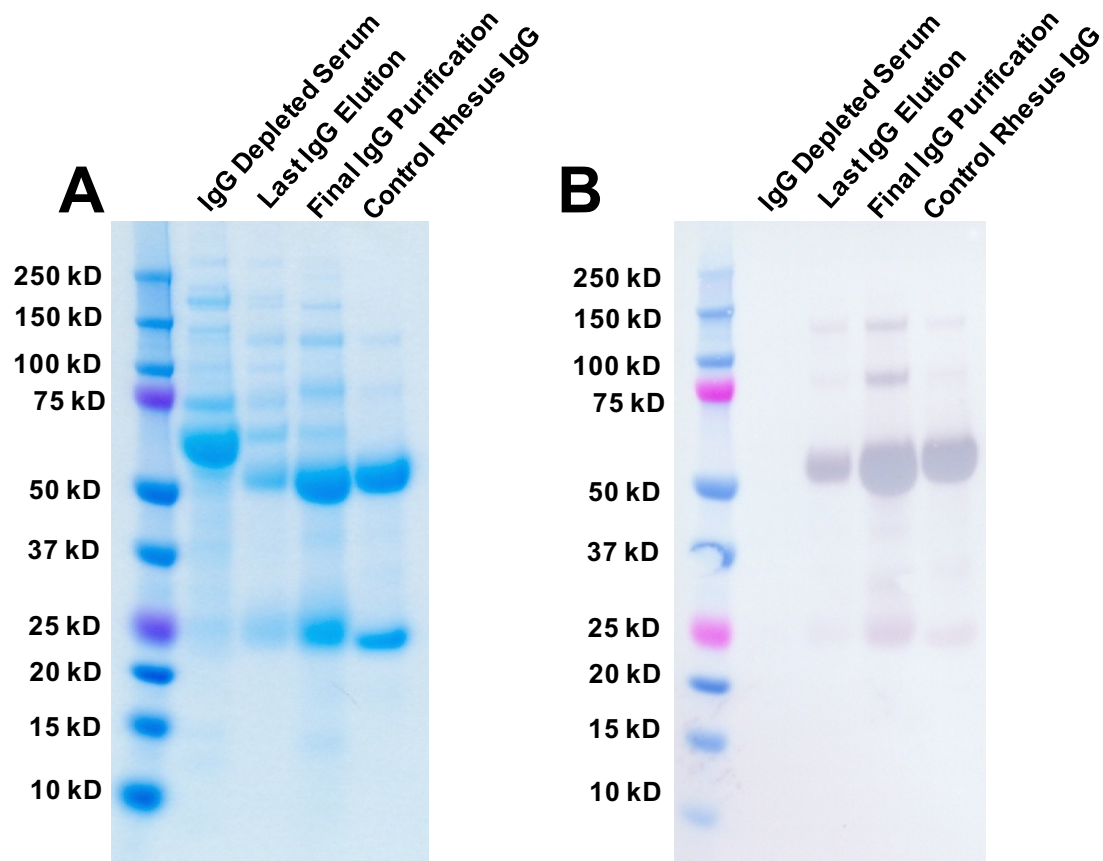

**Supplemental Figure 3. Quality control of purified high-potency RhCMV HIG product.** (A) Coomassie under reducing conditions showing high-potency HIG preparation purified from RhCMV-seropositive rhesus plasma (3<sup>rd</sup> column). (B) Western blot under reducing conditions demonstrating high-potency HIG preparation detected by rabbit anti-monkey IgG-AP showing absence of IgG in depleted sera (1<sup>st</sup> column) as well as distinct heavy and light chain bands (3<sup>rd</sup> column – 55 and 25kDa) (C) Details regarding the purification process and final composition and endotoxin levels of the high-potency HIG product.

## A PK modeling parameters for two-compartment model

| Body weight normalized PK parameters | Standard Potency HIG Infused |          | Dose-optimized, high-potency HIG infused |          |
|--------------------------------------|------------------------------|----------|------------------------------------------|----------|
|                                      | Mean (n=3)                   | SD (n=3) | Mean (n=3)                               | SD (n=3) |
| Volume 1 (mL/kg)                     | 42.9                         | 14.9     | 42.1                                     | 11.9     |
| Clearance (mL/day/kg)                | 6.43                         | 1.06     | 6.34                                     | 1.59     |
| Volume 2 (mL/kg)                     | 26.0                         | 10.3     | 19.3                                     | 8.82     |
| Distribution Clearance (mL/day/kg)   | 7.13                         | 5.66     | 71.3                                     | 102      |
| Half-life (day)                      | 4.54                         | 0.825    | 7.13                                     | 0.329    |

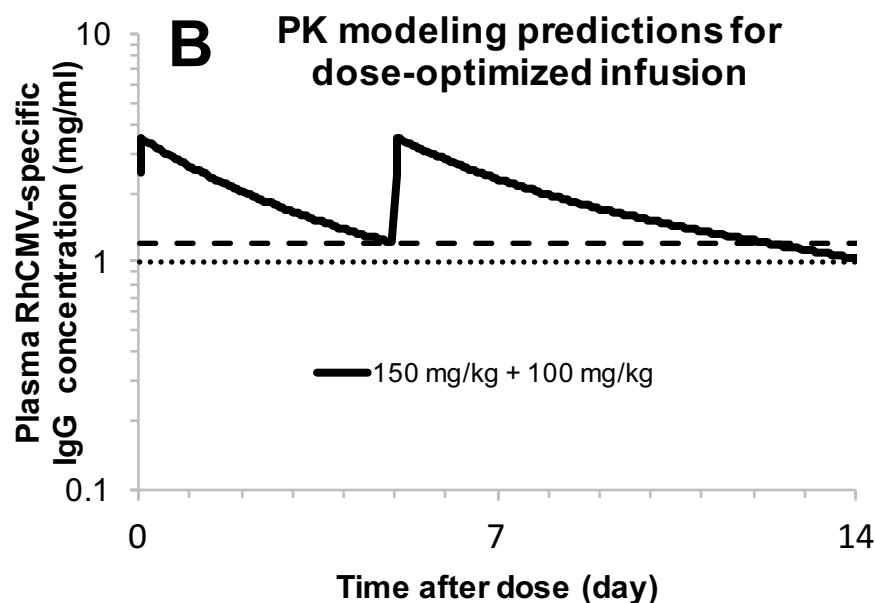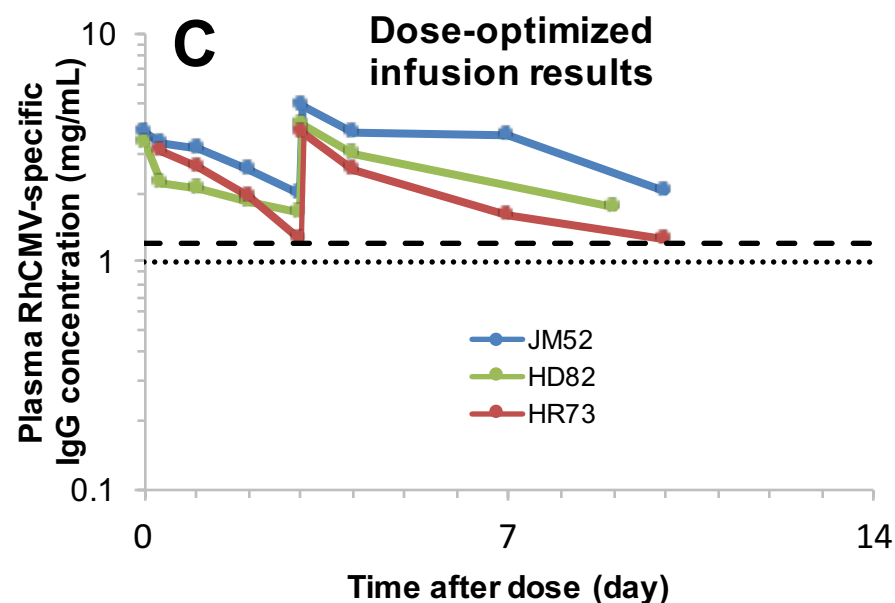

**Supplemental Figure 4. Pharmacokinetic (PK) modeling for dose-optimization of high-potency HIG infusion.** (a) PK coefficients were calculated using a two-compartment model system for standard HIG infusion and dose-optimized, high-potency HIG infusion. (b) An initial loading dose of 150mg/kg followed by a second dose of 100mg/kg 3 days later was determined to be the optimal regimen to maintain a level of infused IgG above 1-1.2mg/mL (estimated epithelial ID<sub>50</sub> of 1000; horizontal dotted black lines), for 14 days. (c) HIG infusion kinetics for high potency HIG infused animals accurately mimicked the PK prediction.

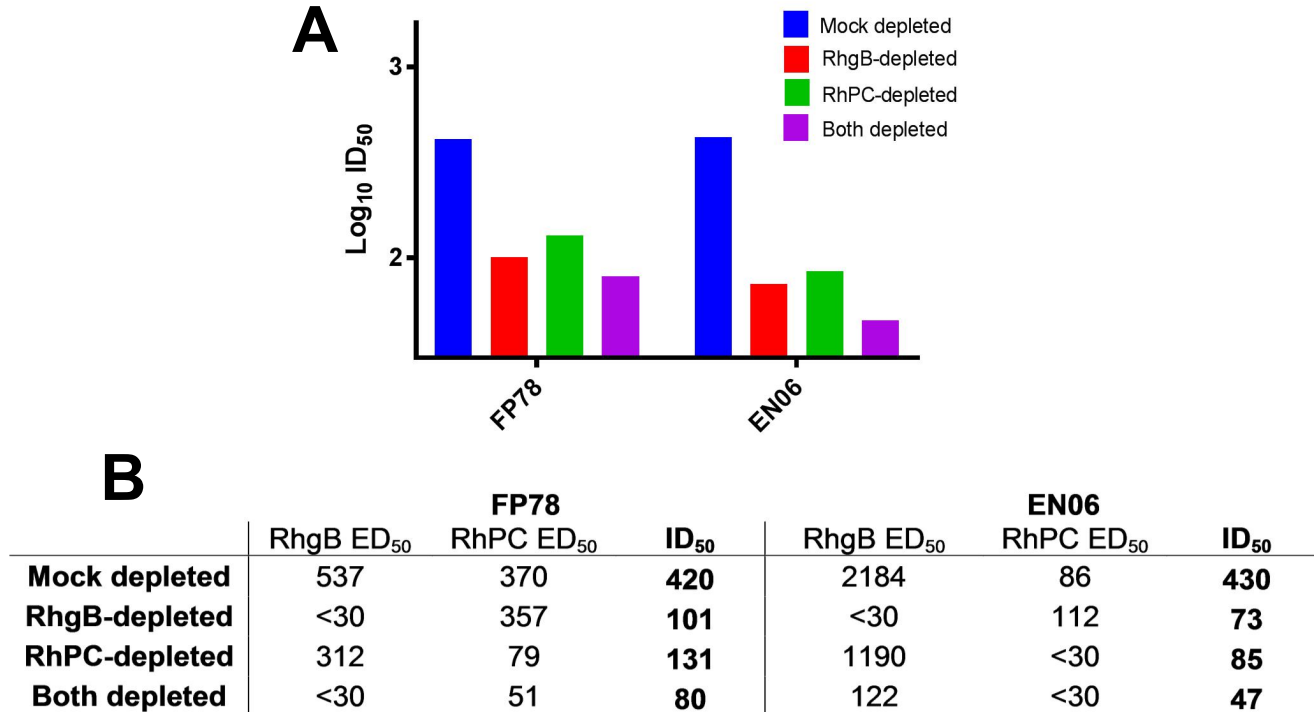

**Supplemental Figure 5. Both RhCMV gB and PC-specific antibodies contribute to neutralization activity of individual RhCMV-seropositive rhesus monkeys.** (A) ID<sub>50</sub> values depict the relative neutralization potency of mock-depleted, RhgB-depleted, PC-depleted, and both RhgB/RhPC-depleted antibody preparations. (B) ID<sub>50</sub> values for depleted antibodies measured in epithelial cells with UCD52 virus (starting dilution 1:10). ELISA ED<sub>50</sub> values confirm specific depletion of antibodies for a given antigen (starting dilution 1:30). Each data point represents the mean value of two experimental replicates.

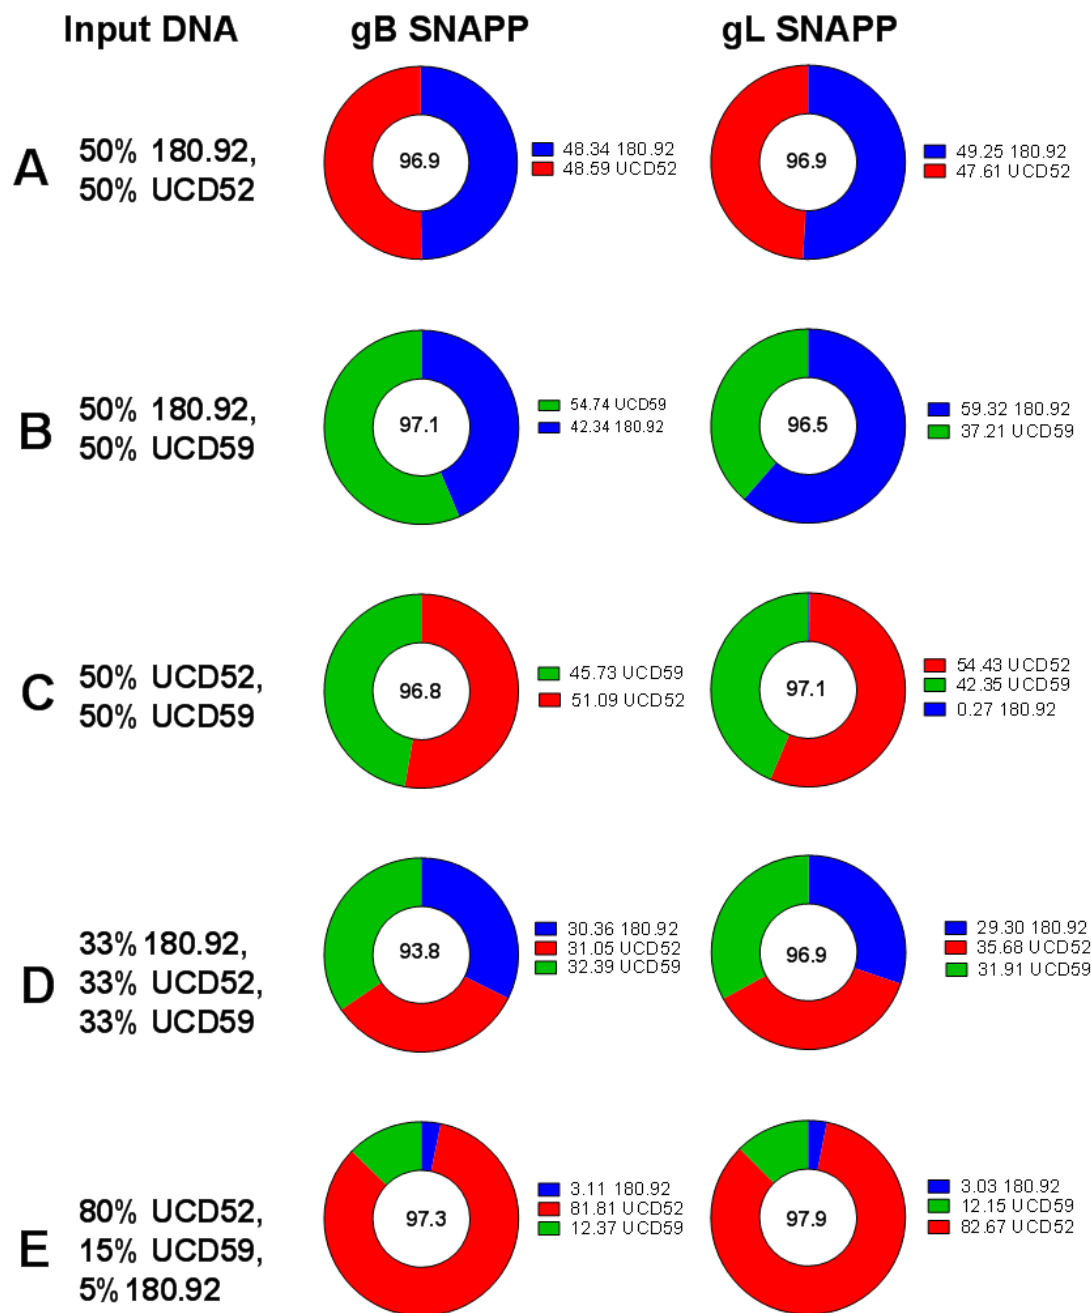

**Supplemental Figure 6. Short NGS Amplicon Population Profiling (SNAPP) accurately reflects input strain-specific viral DNA. (A)** Viral DNA from RhCMV viral strains 180.92 and UCD52 mixed in equal proportions (50% 180.92 + 50% UCD52), then sequenced by SNAPP at the gB and gL loci results in raw sequencing reads of 180.92 and UCD52 corresponding to the original ratio of input DNA. This result is replicated for RhCMV viral DNA mixed in various ratios (**B-E**). The number in center of each ring represents percentage of sequenced reads passing quality filters. The percentage of input reads corresponding to individual viral strains is denoted by the legend adjacent to each plot.

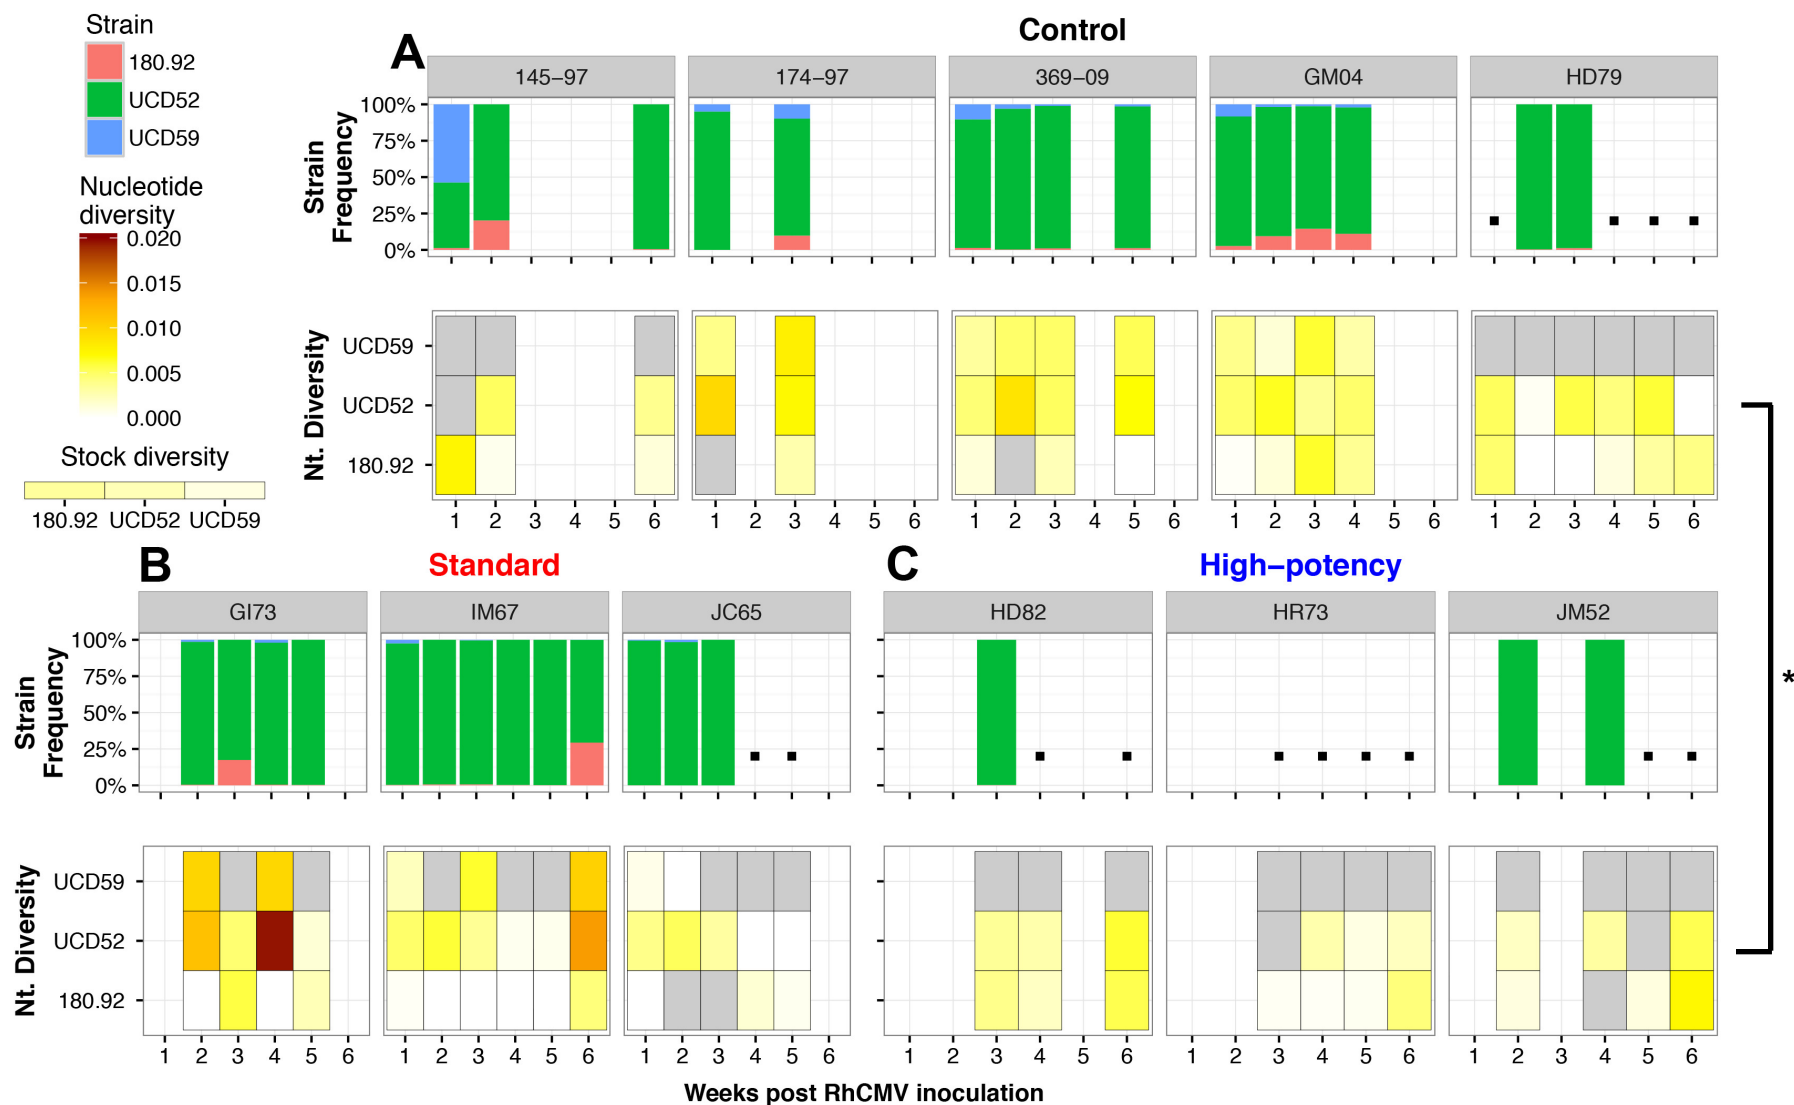

**Supplemental Figure 7. Glycoprotein L SNAPP confirms restricted plasma viral diversity in high-potency HIG group.**

Legend next page



**Supplemental Figure 7. Glycoprotein L SNAPP confirms restricted plasma viral diversity in high-potency HIG group.**

Analogous to Fig 4, deep-sequencing analysis for maternal plasma virus population is shown for (A) 5 control dams (145-97, 174,97, 369-09, GM04, and HD79), (B) 3 standard HIG infused dams (GI73, IM67, and JC65), and (C) 3 high-potency HIG infused dams (HD82, HR73, and JM52). The **upper panel** indicates the percentage of sequence reads corresponding to each of the three inoculated RhCMV strains in plasma at weeks 1-6 post infection (180.92 in pink, UCD52 in green, and UCD59 in blue), which was similar between the treatment groups. ■ denotes samples amplified by nested PCR with known primer bias. The **lower panel** for each animal is a heat map depiction of viral nucleotide diversity ( $\pi$ ), calculated as the mean  $\pi$  value across each sample's haplotype sequences. Scale ranges from white ( $\pi=0$ ) to dark red ( $\pi=0.02$ ). Gray coloring indicates that no sequence reads were detected at that time point for a given viral variant. Blank areas represent sample non-availability (control group) or limited plasma viral load (<100 copies/mL). There is a significant reduction in diversity at the gL locus for the dominant strain in plasma (UCD52) following high-potency HIG infusion (\* $p=0.036$ , Wilcoxon exact test). Each data point represents the mean value of two or more experimental replicates. Historical control animal 274-98 was omitted from this analysis because it was only inoculated with a single strain (180.92).

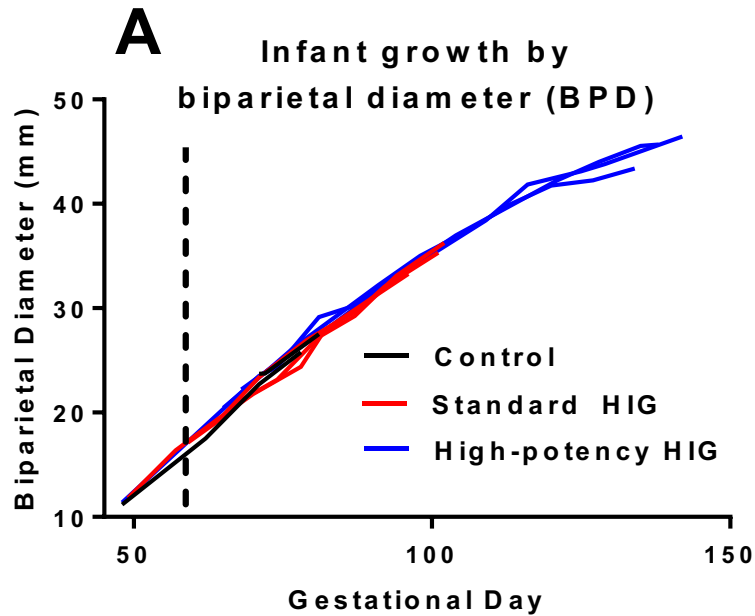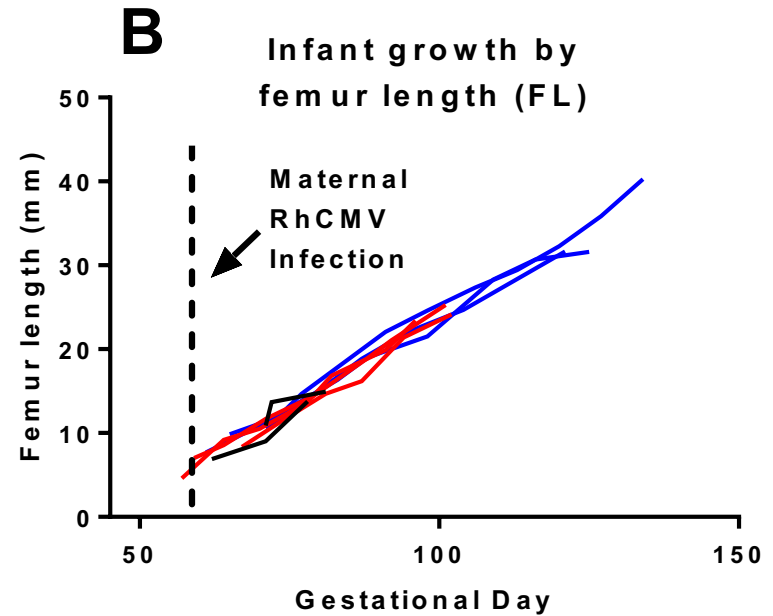

**Supplemental Figure 8. Growth of RhCMV infected rhesus monkey fetuses is similar between control and HIG pretreatment groups.** Fetuses were monitored regularly for signs of intrauterine growth restriction by ultrasound examination. Growth was measured by **(A)** biparietal diameter (BPD) and **(B)** femur length, and was within normal limits for all animals

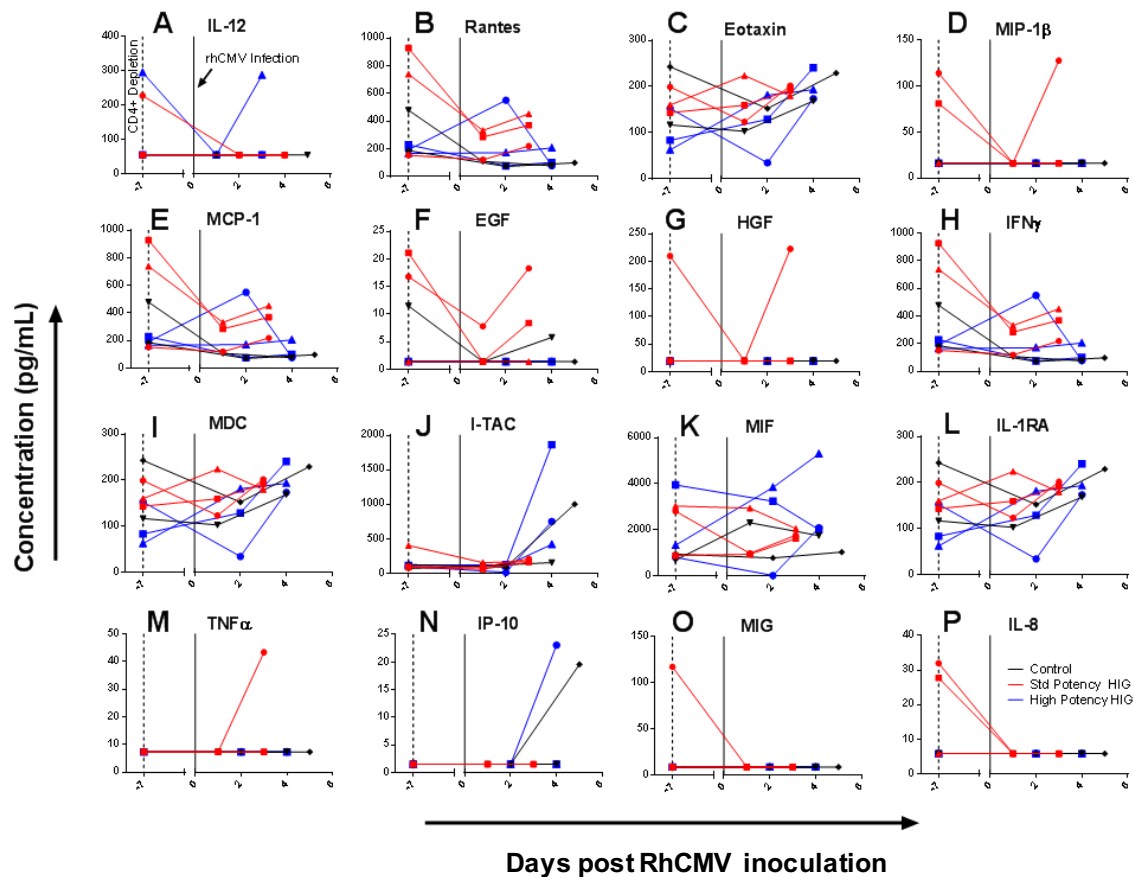

\*Levels below limit of detection for:  
FGF, IL-1β, G-CSF, IL-10, IL-6, IL-17, MIP-1α, GM-CSF, IL-15, IL-5, VEGF, IL-2, IL-4

**Supplemental Figure 9. Plasma cytokine and growth factor profile of RhCMV-infected rhesus dams is similar between control and HIG pre-treatment groups.** 16 cytokines were detectable above background levels at one or more of the tested time points: IL-12 (A), Rantes (CCL5) (B), Eotaxin (C), MIP-1β (CCL4) (D), MCP-1 (E), EGF (F), HGF (G), IFNγ (H), MDC (CCL22) (I), I-TAC (CXCL11) (J), MIF (K), IL-1RA (L), TNFα (M), IP-10 (CXCL10) (N), MIG (CXCL9) (O), and IL-8 (P). Dotted vertical line indicates time of CD4+ T cell depletion, and solid vertical line indicates time of RhCMV infection. Two experimental replicates were completed for each data point.

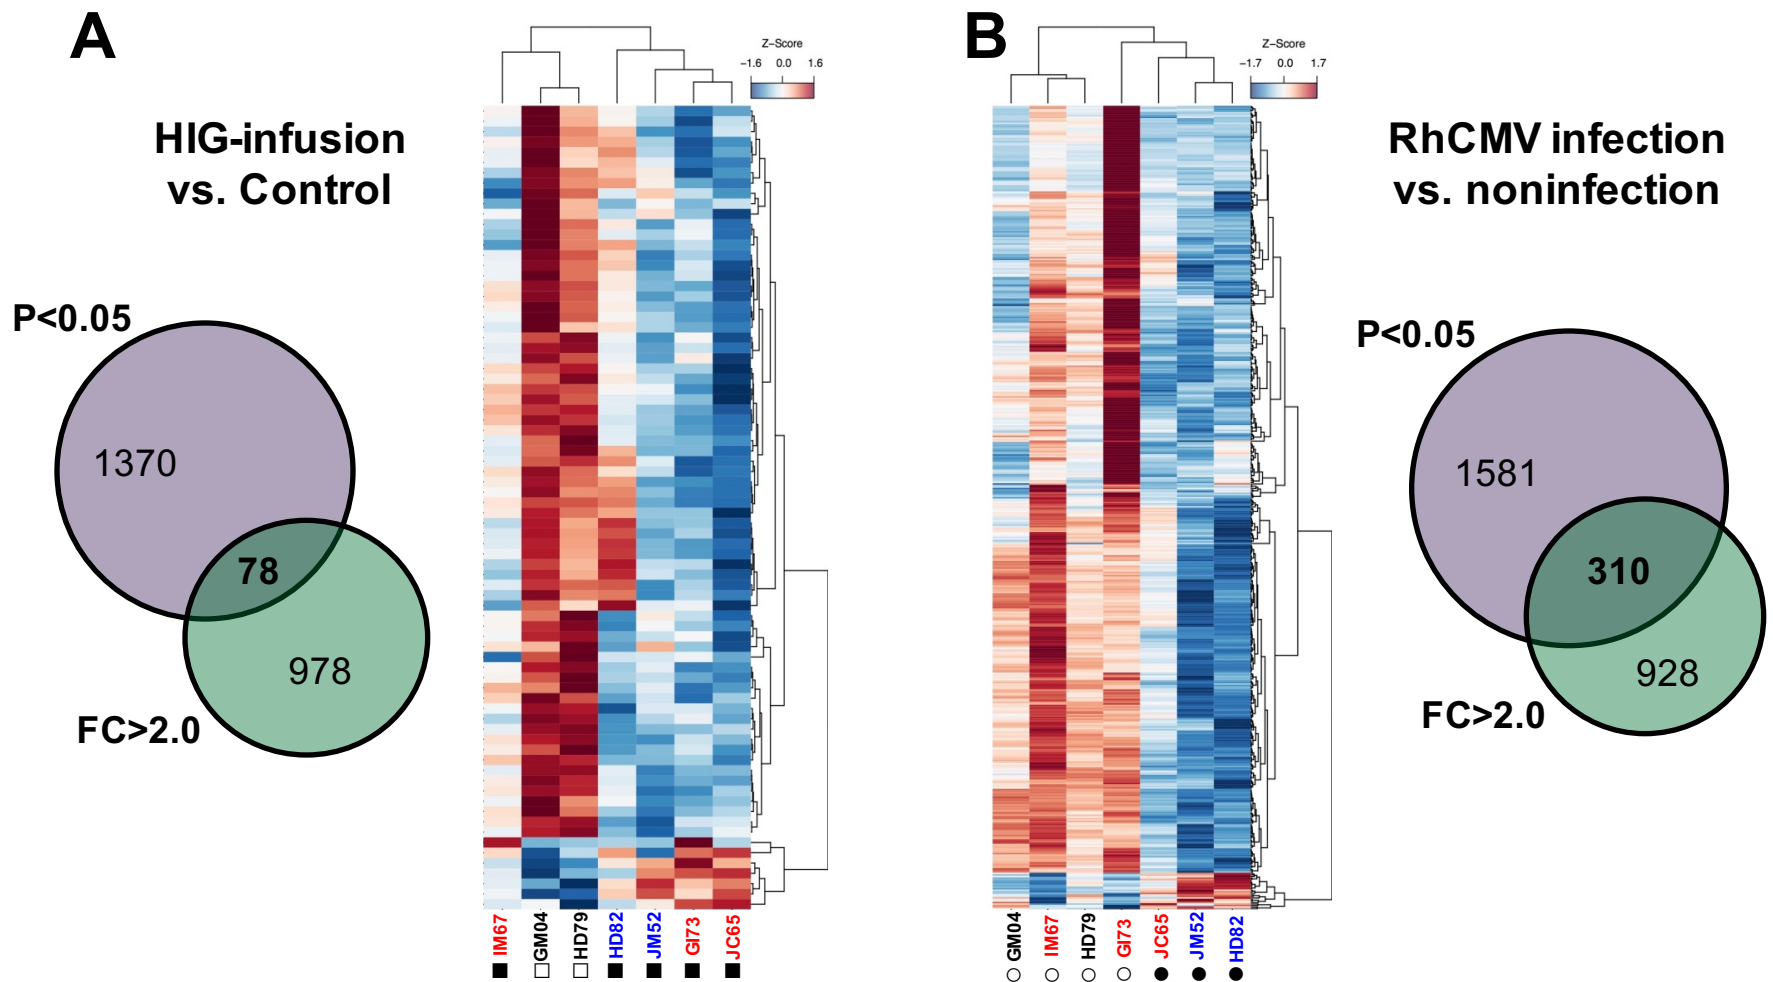

**Supplemental Figure 10. Placental transcriptome is influenced more by RhCMV infection than HIG pretreatment or the outcome of fetal loss.** (A) Heat map and Venn diagram for 78 differentially-expressed genes ( $p < 0.05$ ,  $fc > 2.0$ ) for dams with protected fetuses vs. dams with fetal loss (■=HIG pre-treatment/fetal survival; □=fetal loss) (B) Heat map and Venn diagram for 310 differentially-expressed genes ( $p < 0.05$ ,  $fc > 2.0$ ) for RhCMV-transmitting vs. nontransmitting dams (●=no RhCMV placental transmission; ○=placental transmission). Samples and genes are clustered based on correlation distance with complete linkage. A single transcriptome microarray was completed for each sample.

| <b>Marker</b> | <b>Fluorophore</b> | <b>Clone</b> | <b>Manufacturer</b> | <b>Staining</b> |
|---------------|--------------------|--------------|---------------------|-----------------|
| CCR7          | FITC               | 150503       | R&D Systems         | Surface         |
| CD95          | PE                 | DX2          | BD Biosciences      | Surface         |
| CD28          | PerCP-Cy5.5        | L293         | BD Biosciences      | Surface         |
| CD4           | PE-Cy7             | L200         | BD Biosciences      | Surface         |
| CD20          | APC                | L27          | BD Biosciences      | Surface         |
| CD3           | AF700              | SP34-2       | BD Biosciences      | Surface         |
| CD8           | APC-Cy7            | RPA-T8       | BD Biosciences      | Surface         |
| CD45          | VD450              | D058-1283    | BD Biosciences      | Surface         |

**Supplemental Table 1.** Fluorescently-labeled antibodies used in flow cytometry analysis.

|                     | Monkey | Week  | gB     |        |        | gL     |        |        |
|---------------------|--------|-------|--------|--------|--------|--------|--------|--------|
|                     |        |       | 180.92 | UCD52  | UCD59  | 180.92 | UCD52  | UCD59  |
| Viral Stocks        | 180.92 | Stock | 0.0037 | 0.0000 | NA     | 0.0033 | NA     | NA     |
|                     | UCD52  | Stock | NA     | 0.0014 | NA     | NA     | 0.0025 | NA     |
|                     | UCD59  | Stock | NA     | 0.0000 | 0.0030 | NA     | NA     | 0.0010 |
| Control             | 145-97 | 1     | NA     | 0.0003 | 0.0000 | 0.0073 | 0.0214 | 0.0230 |
|                     | 145-97 | 2     | NA     | 0.0036 | NA     | 0.0006 | 0.0052 | NA     |
|                     | 145-97 | 6     | 0.0000 | 0.0075 | 0.0113 | 0.0013 | 0.0038 | NA     |
|                     | 174-97 | 1     | 0.0018 | 0.0147 | 0.0050 | NA     | 0.0095 | 0.0039 |
|                     | 174-97 | 3     | 0.0160 | 0.0091 | 0.0074 | 0.0028 | 0.0070 | 0.0077 |
|                     | 369-09 | 1     | 0.0066 | 0.0069 | 0.0082 | 0.0013 | 0.0046 | 0.0033 |
|                     | 369-09 | 2     | NA     | 0.0122 | 0.0015 | NA     | 0.0086 | 0.0049 |
|                     | 369-09 | 3     | 0.0059 | 0.0099 | 0.0156 | 0.0025 | 0.0052 | 0.0049 |
|                     | 369-09 | 5     | NA     | 0.0089 | 0.0028 | 0.0000 | 0.0067 | 0.0054 |
|                     | 369-09 | 7     | NA     | 0.0170 | 0.0148 | 0.0000 | 0.0037 | NA     |
|                     | 369-09 | 9     | NA     | 0.0029 | 0.0040 | NA     | 0.0021 | NA     |
|                     | GM04   | 1     | 0.0000 | 0.0026 | 0.0124 | 0.0002 | 0.0049 | 0.0039 |
|                     | GM04   | 2     | 0.0011 | 0.0148 | 0.0081 | 0.0013 | 0.0064 | 0.0015 |
|                     | GM04   | 3     | 0.0088 | 0.0094 | 0.0067 | 0.0062 | 0.0035 | 0.0061 |
|                     | GM04   | 4     | 0.0089 | 0.0046 | 0.0154 | 0.0036 | 0.0049 | 0.0029 |
|                     | GM04   | 5     | 0.0034 | 0.0013 | NA     |        |        |        |
|                     | HD79   | 1     | 0.0022 | 0.0012 | 0.0104 | 0.0048 | 0.0052 | NA     |
|                     | HD79   | 2     | 0.0041 | 0.0052 | 0.0011 | 0.0000 | 0.0004 | NA     |
|                     | HD79   | 3     | 0.0096 | 0.0009 | 0.0160 | 0.0000 | 0.0057 | NA     |
|                     | HD79   | 4     | 0.0028 | 0.0024 | NA     | 0.0011 | 0.0043 | NA     |
|                     | HD79   | 5     | 0.0029 | 0.0027 | NA     | 0.0033 | 0.0061 | NA     |
|                     | HD79   | 6     | NA     | 0.0037 | 0.0032 | 0.0041 | 0.0000 | NA     |
| Standard<br>HIG     | GI73   | 1     | NA     | 0.0149 | 0.0099 |        |        |        |
|                     | GI73   | 2     | NA     | 0.0113 | 0.0015 | 0.0000 | 0.0114 | 0.0098 |
|                     | GI73   | 3     | NA     | 0.0130 | 0.0014 | 0.0058 | 0.0047 | NA     |
|                     | GI73   | 4     | NA     | 0.0006 | NA     | 0.0000 | 0.0196 | 0.0097 |
|                     | GI73   | 5     | 0.0030 | 0.0080 | 0.0021 | 0.0024 | 0.0015 | NA     |
|                     | GI73   | 6     | NA     | 0.0011 | 0.0119 |        |        |        |
|                     | IM67   | 1     | 0.0114 | 0.0060 | 0.0084 | 0.0003 | 0.0049 | 0.0023 |
|                     | IM67   | 2     | NA     | 0.0131 | 0.0027 | 0.0000 | 0.0060 | NA     |
|                     | IM67   | 3     | 0.0026 | 0.0026 | 0.0005 | 0.0000 | 0.0035 | 0.0062 |
|                     | IM67   | 4     | 0.0050 | 0.0015 | 0.0010 | 0.0000 | 0.0005 | NA     |
|                     | IM67   | 5     | 0.0014 | 0.0139 | 0.0055 | 0.0000 | 0.0006 | NA     |
|                     | IM67   | 6     | NA     | 0.0170 | 0.0112 | 0.0044 | 0.0138 | 0.0101 |
|                     | JC65   | 1     | NA     | 0.0062 | 0.0013 | 0.0000 | 0.0039 | 0.0008 |
|                     | JC65   | 2     | NA     | 0.0026 | NA     | NA     | 0.0053 | 0.0000 |
|                     | JC65   | 3     | NA     | 0.0035 | 0.0086 | NA     | 0.0032 | NA     |
|                     | JC65   | 4     | NA     | 0.0140 | 0.0027 | 0.0015 | 0.0000 | NA     |
|                     | JC65   | 5     | NA     | 0.0008 | 0.0053 | 0.0005 | 0.0000 | NA     |
|                     | JC65   | 6     | NA     | 0.0132 | 0.0014 |        |        |        |
| High-potency<br>HIG | HD82   | 2     | NA     | 0.0011 | NA     |        |        |        |
|                     | HD82   | 3     | NA     | 0.0053 | 0.0186 | 0.0039 | 0.0035 | NA     |
|                     | HD82   | 4     | NA     | 0.0005 | NA     | 0.0020 | 0.0028 | NA     |
|                     | HD82   | 6     | 0.0021 | 0.0000 | NA     | 0.0056 | 0.0061 | NA     |
|                     | HR73   | 3     | 0.0018 | NA     | NA     | 0.0004 | NA     | NA     |
|                     | HR73   | 4     | NA     | 0.0007 | 0.0005 | 0.0003 | 0.0028 | NA     |
|                     | HR73   | 5     | 0.0023 | 0.0022 | 0.0000 | 0.0005 | 0.0010 | NA     |
|                     | HR73   | 6     | 0.0035 | 0.0037 | 0.0119 | 0.0044 | 0.0022 | NA     |
|                     | JM52   | 2     | NA     | 0.0010 | NA     | 0.0011 | 0.0020 | NA     |
|                     | JM52   | 3     | 0.0011 | 0.0020 | 0.0000 |        |        |        |
|                     | JM52   | 4     | NA     | 0.0008 | NA     | NA     | 0.0032 | NA     |
|                     | JM52   | 5     | NA     | 0.0006 | NA     | 0.0011 | NA     | NA     |
|                     | JM52   | 6     | NA     | 0.0005 | NA     | 0.0072 | 0.0055 | NA     |

**Supplemental Table 2. Raw**

nucleotide diversity values ( $\pi$ )

for plasma variants at gB and gL

loci

| Group                            | Dam    | Transmission<br>Status<br>(AF PCR) | Placental<br>Tissue PCR | Placenta<br>IHC | Microscopic findings                            |
|----------------------------------|--------|------------------------------------|-------------------------|-----------------|-------------------------------------------------|
| <b>Control</b>                   | 369-09 | +                                  | +                       | +               | No significant findings                         |
|                                  | 174-97 | +                                  | +                       | +               | No significant findings                         |
|                                  | 274-98 | +                                  | +                       | -               | No significant findings                         |
|                                  | GM04   | +                                  | +                       | -               | No significant findings                         |
|                                  | HD79   | +                                  | +                       | +               | No significant findings                         |
| <b>Standard<br/>HIG</b>          | GI73   | +                                  | +                       | -               | No significant findings                         |
|                                  | IM67   | +                                  | +                       | +               | Mild lymphocytic and neutrophilic infiltration. |
|                                  | JC65   | -                                  | -                       | -               | No significant findings                         |
| <b>High-<br/>potency<br/>HIG</b> | JM52   | -                                  | -                       | -               | Minimal lymphocytic infiltration.               |
|                                  | HR73   | -                                  | -                       | -               | No significant findings                         |
|                                  | HD82   | -                                  | -                       | -               | No significant findings                         |

**Supplemental Table 3.** Immunohistochemical and microscopic findings in the placenta.

| Gene ID    | log2(fc) | P-value | Gene Title                                      | Gene Description                                                                                        |
|------------|----------|---------|-------------------------------------------------|---------------------------------------------------------------------------------------------------------|
| CCL23      | 6.25     | 0.022   | Chemokine (C-C Motif) Ligand 23                 | Small secreted protein chemotactic for resting T-cells and monocytes                                    |
| SERPINA3   | 5.71     | 0.005   | Serpin Peptidase Inhibitor, Clade A, Member 3   | Plasma protease inhibitor upregulated during trauma and infection                                       |
| KLK2       | 5.49     | 0.011   | Kallikrein Related Peptidase 2                  | Granular trypsin-like serine protease that cleaves at arginine residues                                 |
| GNLY       | 5.21     | 0.008   | Granulysin                                      | Protein found in the granules of cytotoxic T cells and NK cells; induces apoptosis in target cells      |
| OMD        | 5.06     | 0.009   | Osteomodulin                                    | Member of the small leucine-rich repeat proteoglycan family; involved in ECM during bone formation      |
| POSTN      | 5.01     | 0.007   | Periostin, Osteoblast Specific Factor           | Secreted extracellular matrix protein; binds to to integrin from epithelial cell adhesion and migration |
| GZMA       | 4.76     | 0.012   | Granzyme A                                      | Serine protease specific to cytotoxic T cells and NK cells; involved in lysing target cells             |
| MAMU-A3    | 4.69     | 0.030   | Major Histocompatibility Complex, Class I, A    | Antigen-presenting molecules on cell surfaces                                                           |
| C13H2orf40 | 4.65     | 0.014   | Chromosome 2 ORF 40                             |                                                                                                         |
| RORB       | 4.63     | 0.027   | RAR-Related Orphan Receptor B                   | Nuclear hormone receptor that binds to hormone response elements to regulate downstream genes           |
| NDP        | 4.59     | 0.004   | Norrie Disease (Pseudoglioma)                   | Secreted growth factor that activates the Wnt/beta-catenin pathway; mutations Norrie disease            |
| ALDH1A2    | 4.19     | 0.019   | Aldehyde Dehydrogenase 1 Family, Member A2      | Enzyme that catalyzes the synthesis of retinoic acid from retinaldehyde                                 |
| CRISP3     | 4.17     | >0.001  | Cysteine-Rich Secretory Protein 3               |                                                                                                         |
| CCL15      | 4.11     | 0.004   | Chemokine (C-C Motif) Ligand 15                 | Small secreted protein chemotactic for neutrophils, T-cells, and monocytes                              |
| KLRB1      | 4.10     | 0.009   | Killer Cell Lectin-Like Receptor B1             | Membrane glycoprotein expressed by NK cells; involved in regulation of NK cells                         |
| GZMB       | 3.97     | 0.018   | Granzyme B                                      | Serine protease commonly found in the granules of CTLs, NK cells, and cytotoxic T cells                 |
| WT1        | 3.91     | 0.027   | Wilms Tumor 1                                   | Zinc finger transcription factor critical to the normal development of the urogenital system            |
| CTSH       | 3.73     | 0.003   | Cathepsin H                                     | Cysteine protease critical to the degradation of lysosomal proteins                                     |
| IGFBP6     | 3.67     | 0.018   | Insulin-Like Growth Factor Binding Protein 6    | Protein that regulates insulin-like growth factors                                                      |
| PRL        | 3.63     | 0.019   | Prolactin                                       | Anterior pituitary hormone acts as a growth regulator in many tissues; thought to suppress apoptosis    |
| DKK1       | 3.57     | 0.006   | Dickkopf WNT Signaling Pathway Inhibitor 1      | Secreted protein that inhibits the WNT signaling pathway; critical to embryonic development             |
| LYZ        | 3.54     | 0.001   | Lysozyme                                        | Antimicrobial enzyme that cleaves the bacterial cell wall peptidoglycan                                 |
| IGFBP1     | 3.47     | 0.049   | Insulin-Like Growth Factor Binding Protein 1    | Protein that regulates insulin-like growth factors                                                      |
| APOD       | 3.38     | 0.002   | Apolipoprotein D                                | Glycoprotein closely associated with the enzyme lectin cholesterol acyltransferase                      |
| FAP        | 3.29     | 0.011   | Fibroblast Activation Protein, Alpha            | Integral membrane gelatinase involved in fibroblast growth during development                           |
| CACNA3     | 3.23     | 0.031   | Voltage-Dependent Calcium Channel $\alpha$ 2/d3 | Member of a calcium channel complex that regulates calcium ion influx into the cell                     |

**Supplemental Table 4.** Top 25 placental genes up-regulated in RhCMV infection



| Gene ID      | Log2(fc) | P-value | Gene Title                                   | Function                                                                   | Database |
|--------------|----------|---------|----------------------------------------------|----------------------------------------------------------------------------|----------|
| CCL2         | 1.29     | 0.002   | C-C motif chemokine ligand 2                 | Chemoattractant for NK cells                                               | IPA      |
| CD44         | 1.06     | 0.027   | CD44 molecule                                | Cytotoxic triggering molecule on activated NK cells                        | IPA      |
| CD81         | 1.96     | 0.044   | CD81 molecule                                | NK cell adhesion and trafficking                                           | IPA      |
| CXCL8        | 2.91     | 0.028   | C-X-C motif chemokine ligand 8               | Chemotaxis of NK cells                                                     | IPA      |
| FYN          | 1.98     | 0.022   | FYN protein tyrosine kinase                  | NK cell effector function                                                  | IPA      |
| GZMB         | 3.97     | 0.018   | granzyme B                                   | Serine protease cytotoxic effector molecules                               | IPA      |
| HLA-E        | 1.49     | 0.037   | major histocompatibility complex, class I, E | Nonclassical antigen presentation to NK cells                              | KEGG     |
| HLA-G        | 1.75     | 0.02    | major histocompatibility complex, class I, G | Nonclassical antigen presentation to NK cells                              | IPA      |
| IL1RL1       | 2.23     | 0.012   | Interleukin 1 Receptor Like 1                | Differentiation of NK cells                                                | IPA      |
| IL15         | 1.52     | 0.042   | interleukin 15                               | Survival of peripheral NK cells                                            | IPA      |
| KIR2DL4      | 2.24     | 0.014   | killer cell immunoglobulin like receptor     | Activates NK cell cytotoxicity, recognizes HLA-G presentation              | KEGG     |
| KLRB1        | 4.1      | 0.009   | killer cell lectin like receptor B1          | Inhibits NK cell cytotoxicity                                              | IPA      |
| KLRC1 (CD94) | 1.21     | 0.0002  | killer cell lectin like receptor C1          | Activates NK cell cytotoxicity, complexes with KLRD1 for HLA-E recognition | KEGG     |
| KLRC3        | 1.78     | 0.005   | killer cell lectin like receptor C3          | Activates NK cell cytotoxicity                                             | KEGG     |
| KLRD1        | 1.75     | 0.015   | killer cell lectin like receptor D1          | Activates NK cell cytotoxicity, complexes with KLRC1 for HLA-E recognition | KEGG     |
| NKG7         | 2.36     | 0.027   | natural killer cell granule protein 7        | Protein of unknown function on T and NK cells                              | KEGG     |
| PRL          | 3.63     | 0.019   | prolactin                                    | NK cell activation, up-regulation of IL-2R                                 | IPA      |
| RARRES2      | 1.57     | 0.034   | retinoic acid receptor responder 2           | Chemoattractant for NK cells                                               | IPA      |
| SOCS2        | 1.26     | 0.01    | suppressor of cytokine signaling 2           | Regulates NK cell effector function in response to IL-15                   | IPA      |
| TYROBP       | 1.13     | 0.049   | TYRO protein tyrosine kinase binding protein | Activation of NK cells, complexes with KLRC1 (CD94)                        | IPA      |
| VCAM1        | 2.91     | 0.031   | vascular cell adhesion molecule 1            | NK cell adhesion to endothelium                                            | IPA      |

**Supplemental Table 5.** Placental genes up-regulated in RhCMV infection related to NK cell function and/or movement.
